# Supplementary material for: The Level of Knowledge of Parkinson’s Disease among Nonprofessional Caregivers in a Movement Disorders Center in Turkey
Source: Hindawi journal article supplement (doi:10.1155/2017/2652361), 2017-01-01
Supplement: f1 [file 2652361.f1.pdf]

## Annex-1: Questionnaire

- 1 What is your opinion about the state of Parkinson Disease ?
  - a) Temporary
  - b) Permanent
  - c) Progressive
  - d) Don't have an idea
- 2 Can the number of the drugs which your patient take change in time ?
  - a) Yes
  - b) No
  - c) No idea
- 3 Apart from the movement disorder, are there any symptoms originate from the disease ?
  - a) Yes (Please mention).....
  - b) No
  - c) No idea
- 4 Are there any other treatment choices except from oral treatment (medicine) in the treatment of Parkinson Disease ?
  - a) Yes (Please mention) .....
  - b) No
  - c) No idea
- 5 What is the purpose of the current medical treatment ?
  - a) To reduce the symptoms of disease
  - b) Healing of the disease in time completely
  - c) To stop the development of disease in time
  - d) I don't have an idea
- 6 What do you think about exercising in parkinson Disease ?
  - a) The disease becomes worse.
  - b) Nothing changes
  - c) Relaxes the body and develop the movements
  - d) I don't have an idea
- 7 How often do the medicines taken in Parkinson Disease ?
  - a) Morning and evening
  - b) Morning, noon and evening
  - c) At specified hours in the day
  - d) I don't have an idea

8 How can the benefit of your patient becomes in time ?

- a) The effect of the treatment stays constant
- b) The effect of the treatment increases in time
- c) The effect of the treatment decreases in time
- d) I don't have an idea

9 What do you think about the frequency of your patient's coming for doctor visit ?

.....

10 Before it is diagnosed by the doctors, did you guess Parkinson disease ?

Yes (from which symptom ?).....
